# Supplementary material for: Genomic Reporter Constructs to Monitor Pathway-Specific Repair of DNA Double-Strand Breaks
Source: Frontiers journal article supplement (doi:10.3389/fgene.2021.809832), 2022-02-14
Supplement: Data_Sheet_1.docx [file Data_Sheet_1.docx]

(Seluanov et al., 2004; Mao et al., 2007; Mansour et al., 2008, 2010; Xie et al., 2009; Bindra et al., 2013; Gomez-Cabello et al., 2013; Kuhar et al., 2016; Arnoult et al., 2017; Bhargava et al., 2017; Tennant et al., 2020; Roidos et al., 2020)

**References**

Arnoult, N., Correia, A., Ma, J., Merlo, A., Garcia-Gomez, S., Maric, M., et al. (2017). Regulation of DNA repair pathway choice in S and G2 phases by the NHEJ inhibitor CYREN. *Nature* 549, 548–552. doi:10.1038/nature24023.

Bhargava, R., Carson, C. R., Lee, G., and Stark, J. M. (2017). Contribution of canonical nonhomologous end joining to chromosomal rearrangements is enhanced by ATM kinase deficiency. *Proc. Natl. Acad. Sci. U. S. A.* 114, 728–733. doi:10.1073/pnas.1612204114.

Bindra, R. S., Goglia, A. G., Jasin, M., and Powell, S. N. (2013). Development of an assay to measure mutagenic non-homologous end-joining repair activity in mammalian cells. *Nucleic Acids Res.* 41, e115–e115. doi:10.1093/nar/gkt255.

Gomez-Cabello, D., Jimeno, S., Fernández-Ávila, M. J., and Huertas, P. (2013). New Tools to Study DNA Double-Strand Break Repair Pathway Choice. *PLoS One* 8, e77206. Available at: https://doi.org/10.1371/journal.pone.0077206.

Kuhar, R., Gwiazda, K. S., Humbert, O., Mandt, T., Pangallo, J., Brault, M., et al. (2016). Novel fluorescent genome editing reporters for monitoring DNA repair pathway utilization at endonuclease-induced breaks. *Nucleic Acids Res.* 42, e4. doi:10.1093/nar/gkt872.

Mansour, W. Y., Rhein, T., and Dahm-Daphi, J. (2010). The alternative end-joining pathway for repair of DNA double-strand breaks requires PARP1 but is not dependent upon microhomologies. *Nucleic Acids Res.* 38, 6065–6077. doi:10.1093/nar/gkq387.

Mansour, W. Y., Schumacher, S., Rosskopf, R., Rhein, T., Schmidt-Petersen, F., Gatzemeier, F., et al. (2008). Hierarchy of nonhomologous end-joining, single-strand annealing and gene conversion at site-directed DNA double-strand breaks. *Nucleic Acids Res.* 36, 4088–4098. doi:10.1093/nar/gkn347.

Mao, Z., Seluanov, A., Jiang, Y., and Gorbunova, V. (2007). TRF2 is required for repair of nontelomeric DNA double-strand breaks by homologous recombination. *Proc. Natl. Acad. Sci. U. S. A.* 104, 13068–13073. doi:10.1073/pnas.0702410104.

Roidos, P., Sungalee, S., Benfatto, S., Serçin, Ö., Stütz, A. M., Abdollahi, A., et al. (2020). A scalable CRISPR/Cas9-based fluorescent reporter assay to study DNA double-strand break repair choice. *Nat. Commun.* 11, 4077. doi:10.1038/s41467-020-17962-3.

Seluanov, A., Mittelman, D., Pereira-Smith, O. M., Wilson, J. H., and Gorbunova, V. (2004). DNA end joining be comes less efficient and more error-prone during cellular senescence. *Proc. Natl. Acad. Sci. U. S. A.* 101, 7624–7629. doi:10.1073/pnas.0400726101.

Tennant, P. A., Foster, R. G., Dodd, D. O., Sou, I. F., McPhie, F., Younger, N., et al. (2020). Fluorescent in vivo editing reporter (FIVER): A novel multispectral reporter of in vivo genome editing. *bioRxiv*, 2020.07.14.200170. doi:10.1101/2020.07.14.200170.

Xie, A., Kwok, A., and Scully, R. (2009). Role of mammalian Mre11 in classical and alternative nonhomologous end joining. *Nat. Struct. Mol. Biol.* 16, 814–818. doi:10.1038/nsmb.1640.
